# Supplementary material
Source: publisher figshare collection journal article supplement (https://acs.figshare.com/ndownloader/files/4082314)
Supplement: Supplementary file 1 [file 4082314]

## Supporting Information

# Effects of a Catalyst on the Nanostructure and Reactivity of Soot under an Oxygen Atmosphere

*Jing Hu<sup>1</sup>, Zhun Hu<sup>2</sup>, Jun Zhang<sup>3</sup>, Shijin Shuai<sup>3,\*</sup>*

1. School of mechanical engineering, University of Shanghai for Science and Technology, 516 Jungong Road, Shanghai 200093, China; 2. Suzhou Automotive Research Institute, Tsinghua University, 2358 Changan Road, Suzhou 215200, China; 3. State Key Laboratory of Automotive Safety and Energy, Tsinghua University, Tsinghua Park, Beijing 100084, China.

### **Image processing of TEM images**

TEM image processing was implemented using MathWorks MATLAB software, the program algorithm is shown in Figure. S1. And the processing status of CB, partially oxidized soot A and soot B are shown in Figure. S2, Figure. S3, Figure. S4, Figure. S5 and Figure. S6.

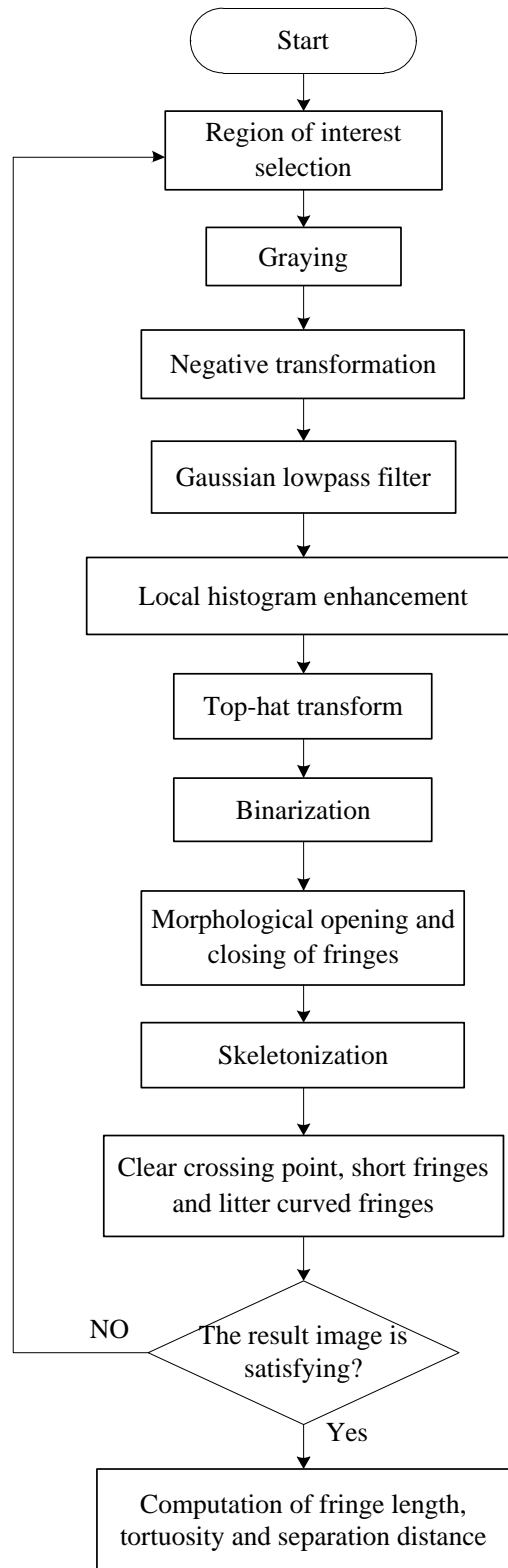

**Figure. S1** Flow chart of TEM image processing

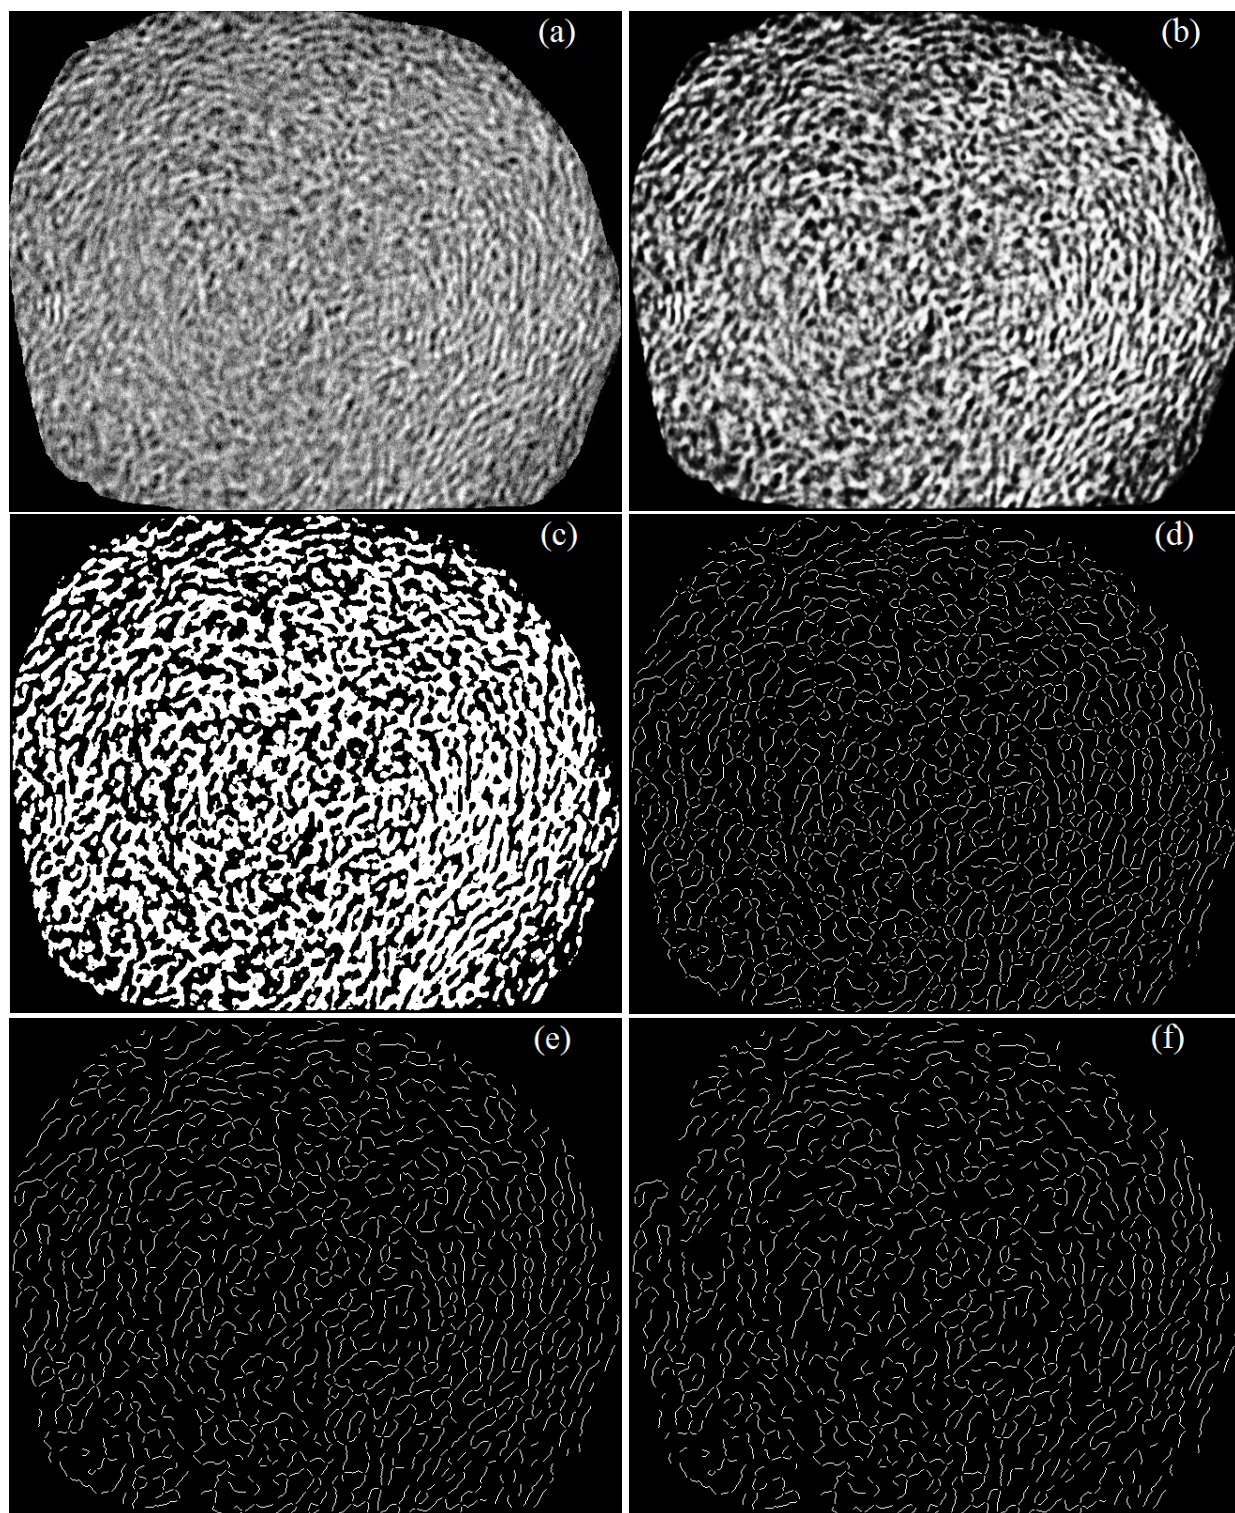

**Figure. S2** Image processing status of CB: (a) result after graying; (b) result after negative transformation; (c) result after binarization; (d) result after clear crossing points; (e) result of clear short fringes; (f) result of clear litter curved fringes.

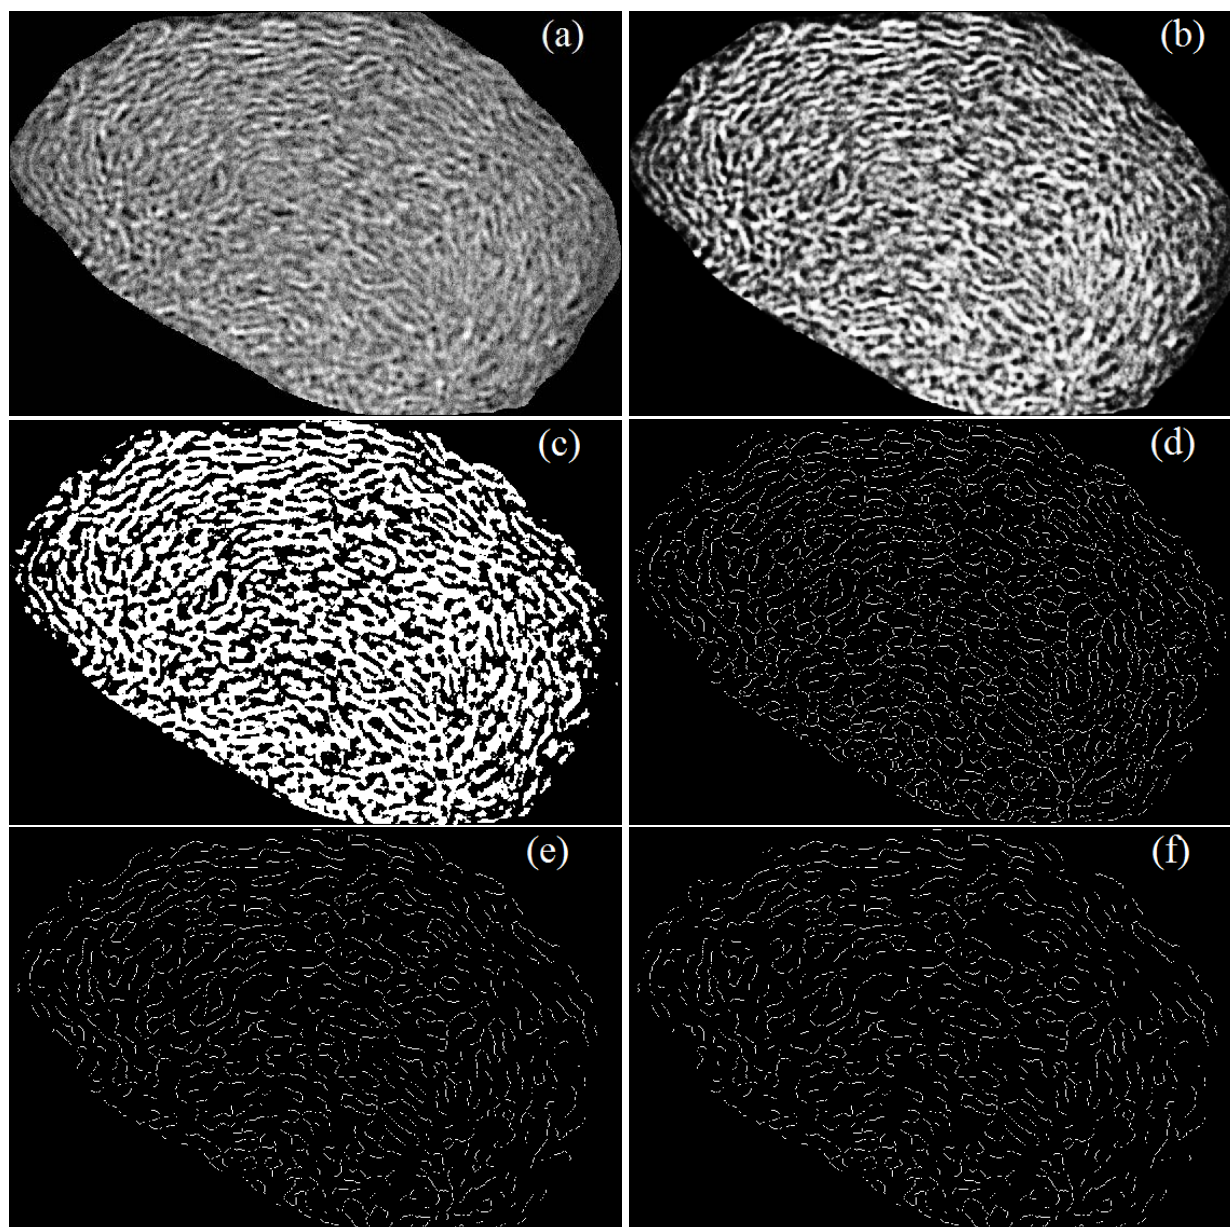

**Figure. S3** Image processing status of soot A at ending temperature of 650°C: (a) result after graying; (b) result after negative transformation; (c) result after binarization; (d) result after clear crossing points; (e) result of clear short fringes; (f) result of clear litter curved fringes.



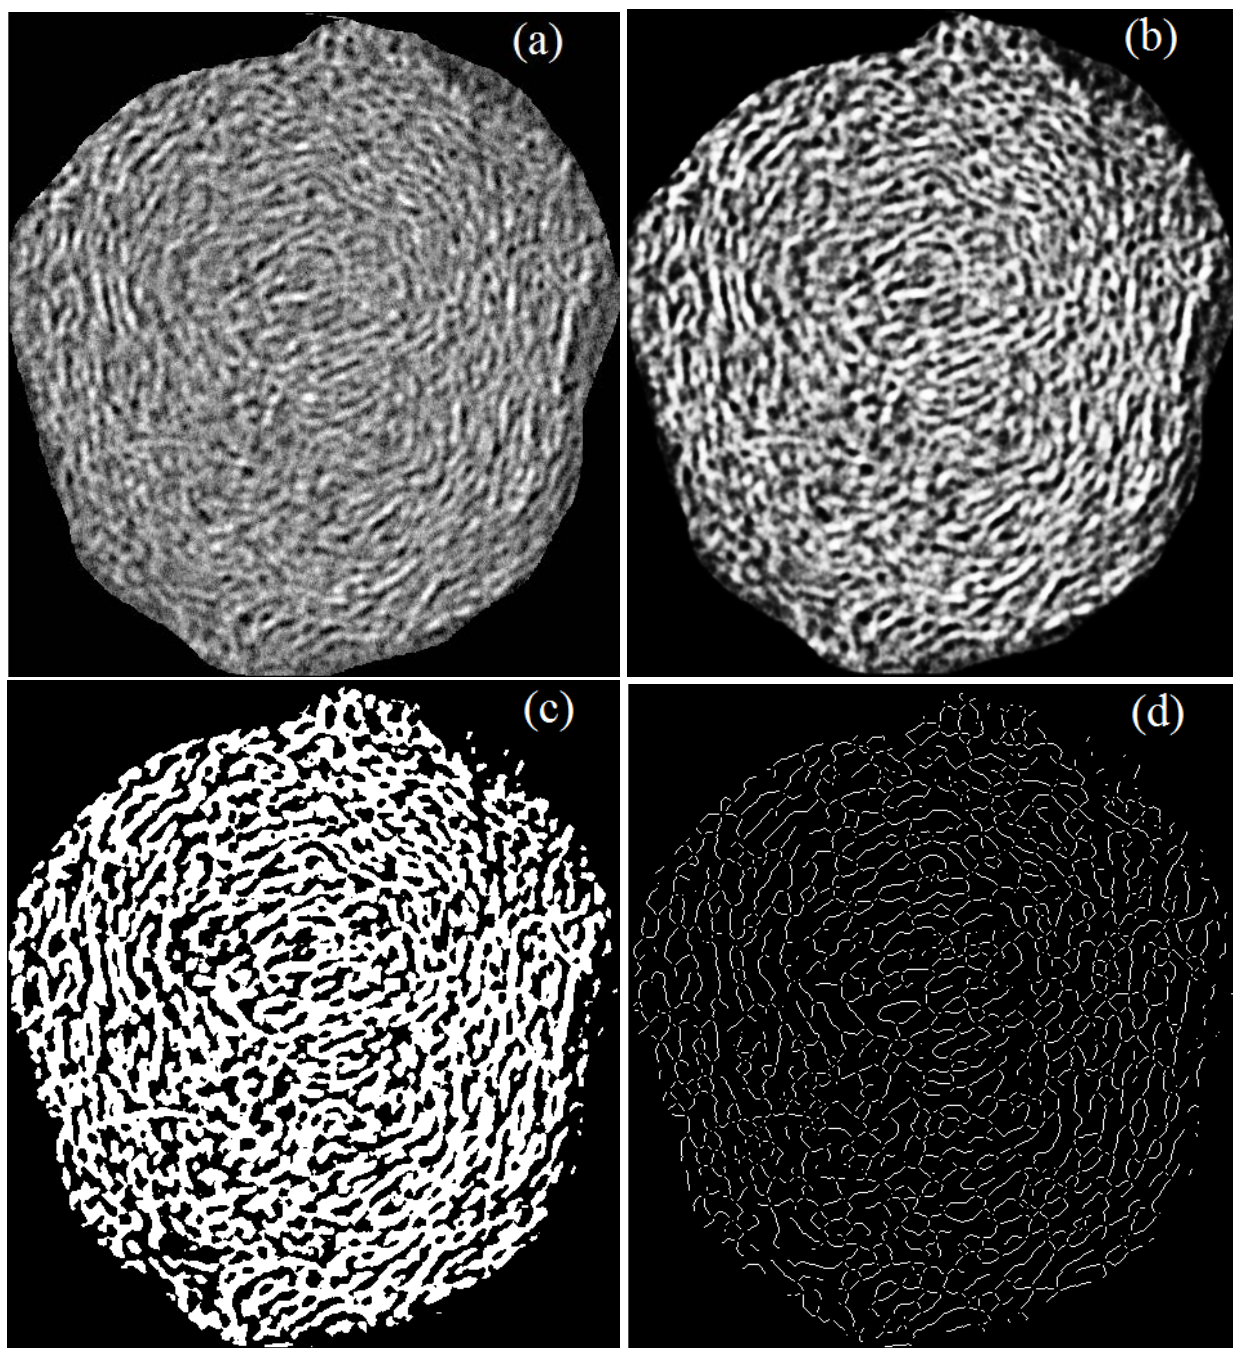

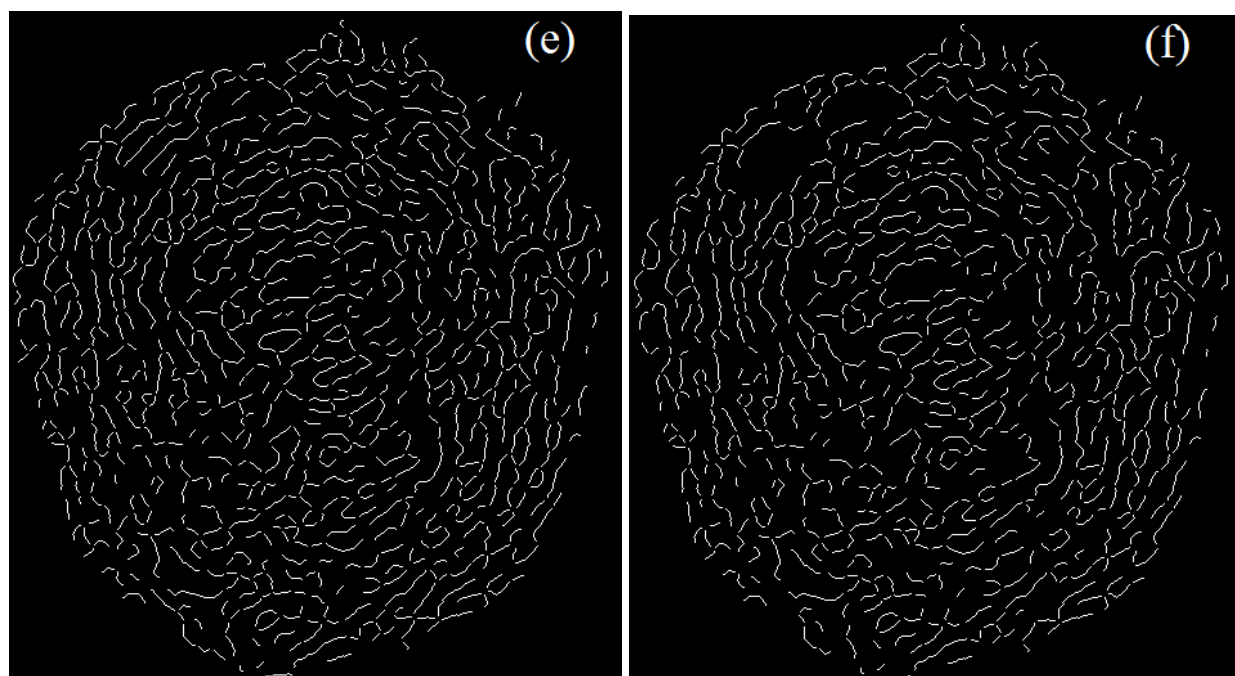

**Figure. S4** Image processing status of soot B at ending temperature of 650°C: (a) result after graying; (b) result after negative transformation; (c) result after binarization; (d) result after clear crossing points; (e) result of clear short fringes; (f) result of clear litter curved fringes.

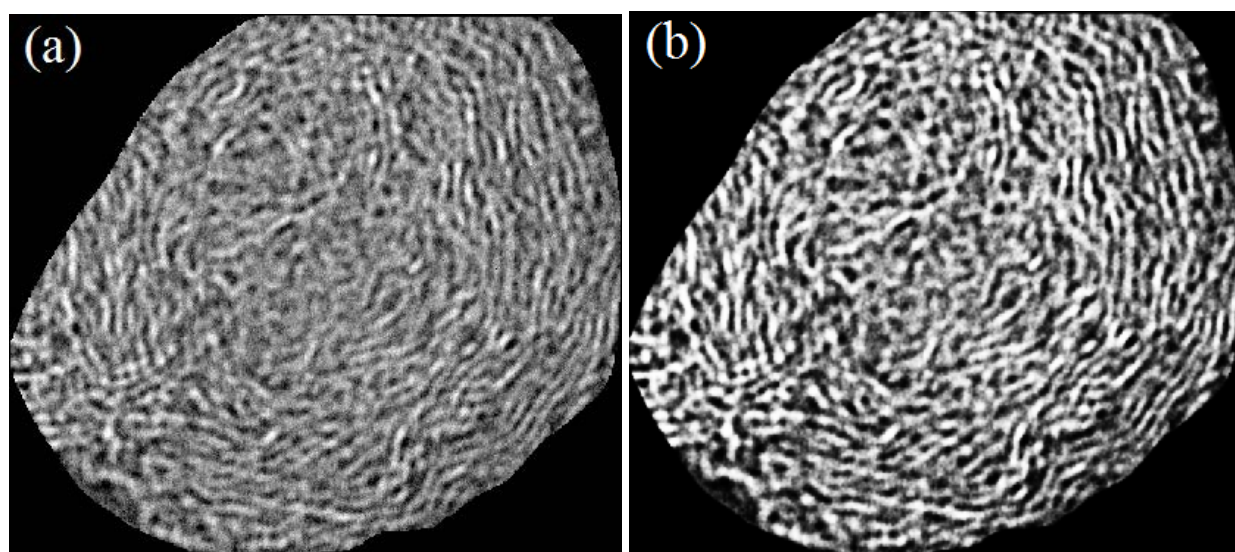

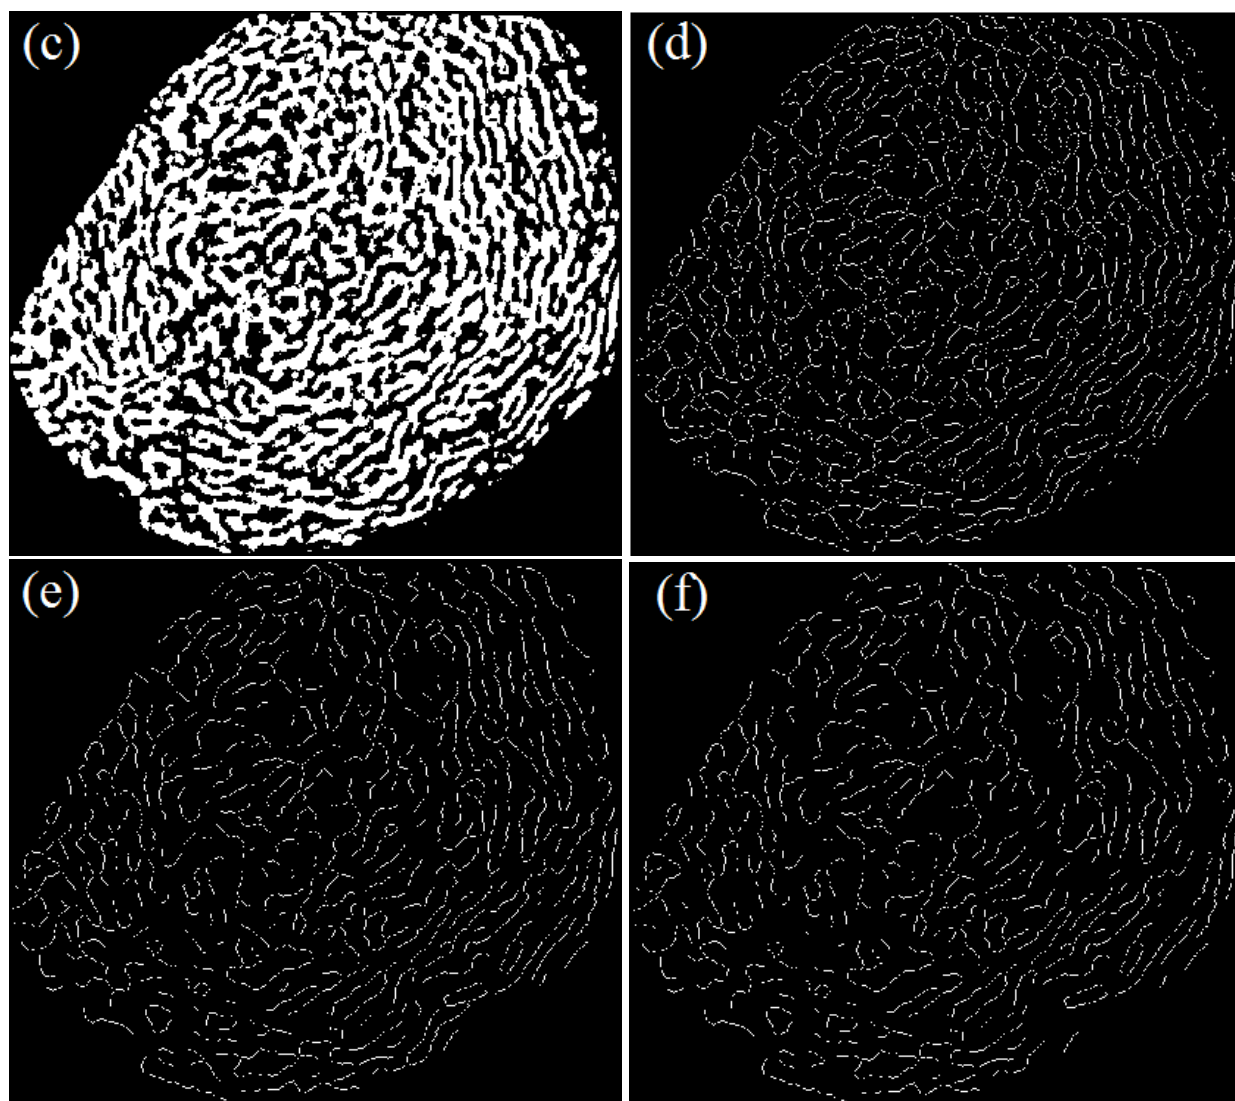

**Figure. S5** Image processing status of soot A at ending temperature of 1000°C: (a) result after graying; (b) result after negative transformation; (c) result after binarization; (d) result after clear crossing points; (e) result of clear short fringes; (f) result of clear litter curved fringes.



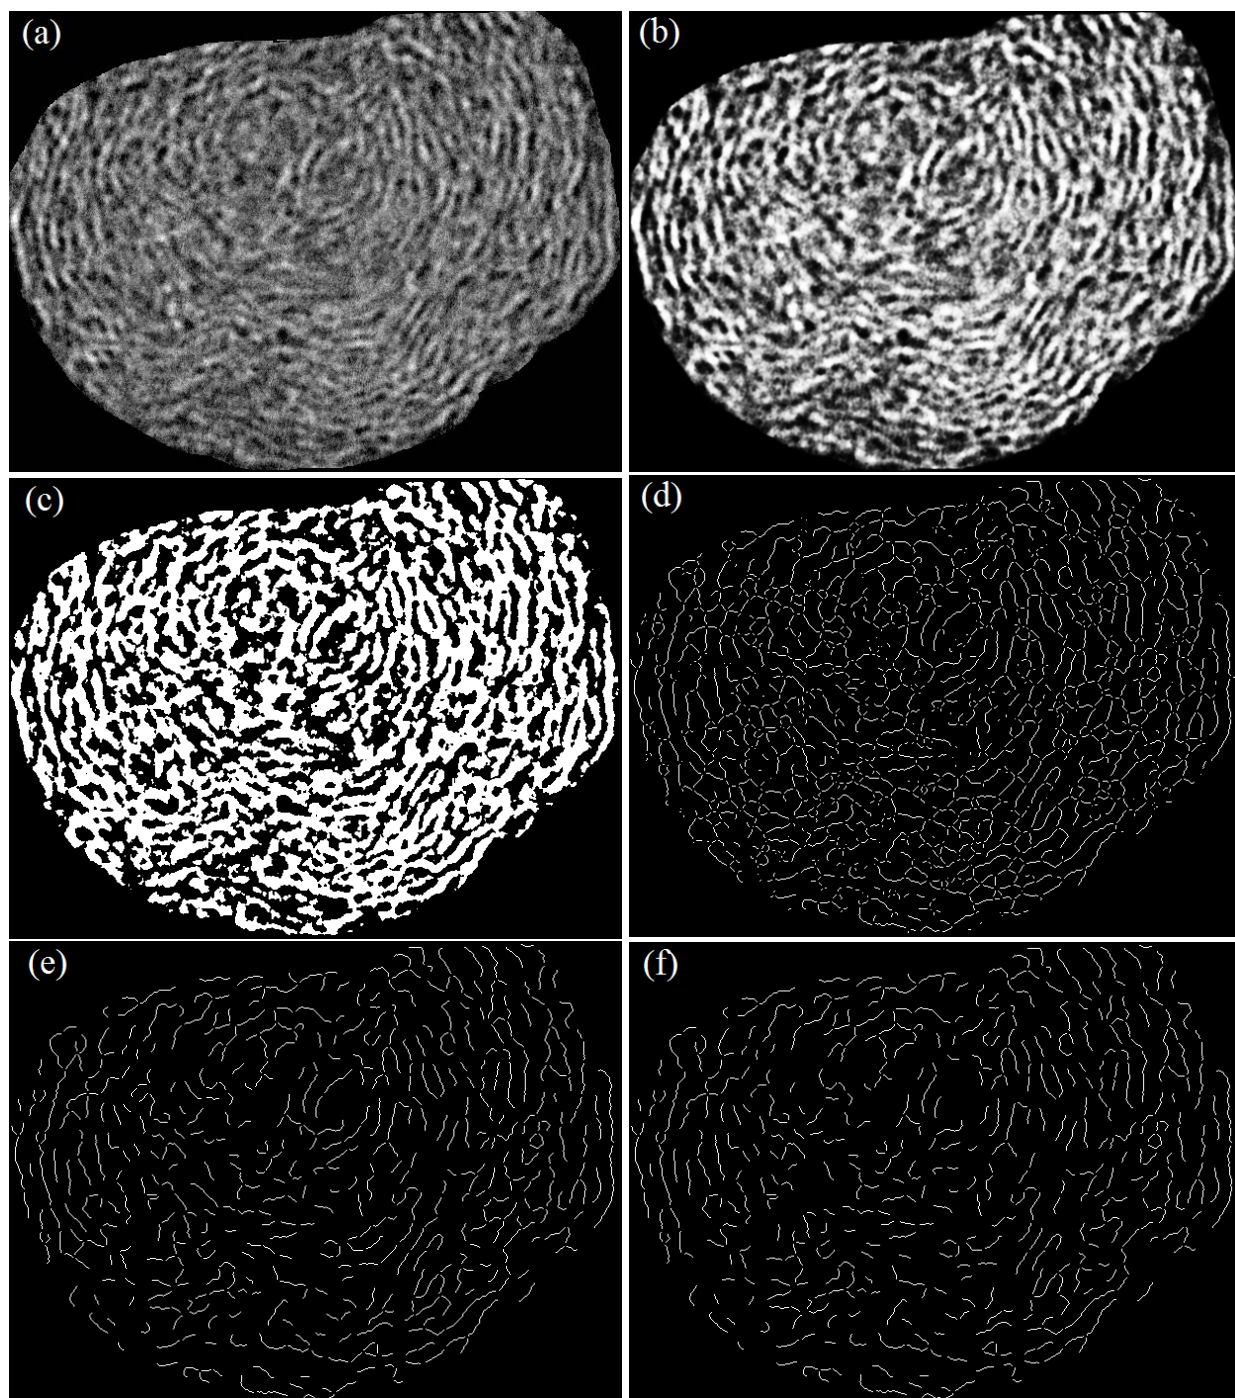

**Figure. S6** Image processing status of soot B at ending temperature of 1000°C: (a) result after graying; (b) result after negative transformation; (c) result after binarization; (d) result after clear crossing points; (e) result of clear short fringes; (f) result of clear litter curved fringes.



## Curve fitted of XPS spectra

The XPS spectra was deconvoluted into 4 Gaussian curves after normalization, data analysis was performed using XPSPEAK. Figure. S7 shows curve fitted results of CB, partially oxidized soot A and soot B, and Table. S1 gives fitting results summary of C1s XPS spectra of CB, partially oxidized soot A and soot B.

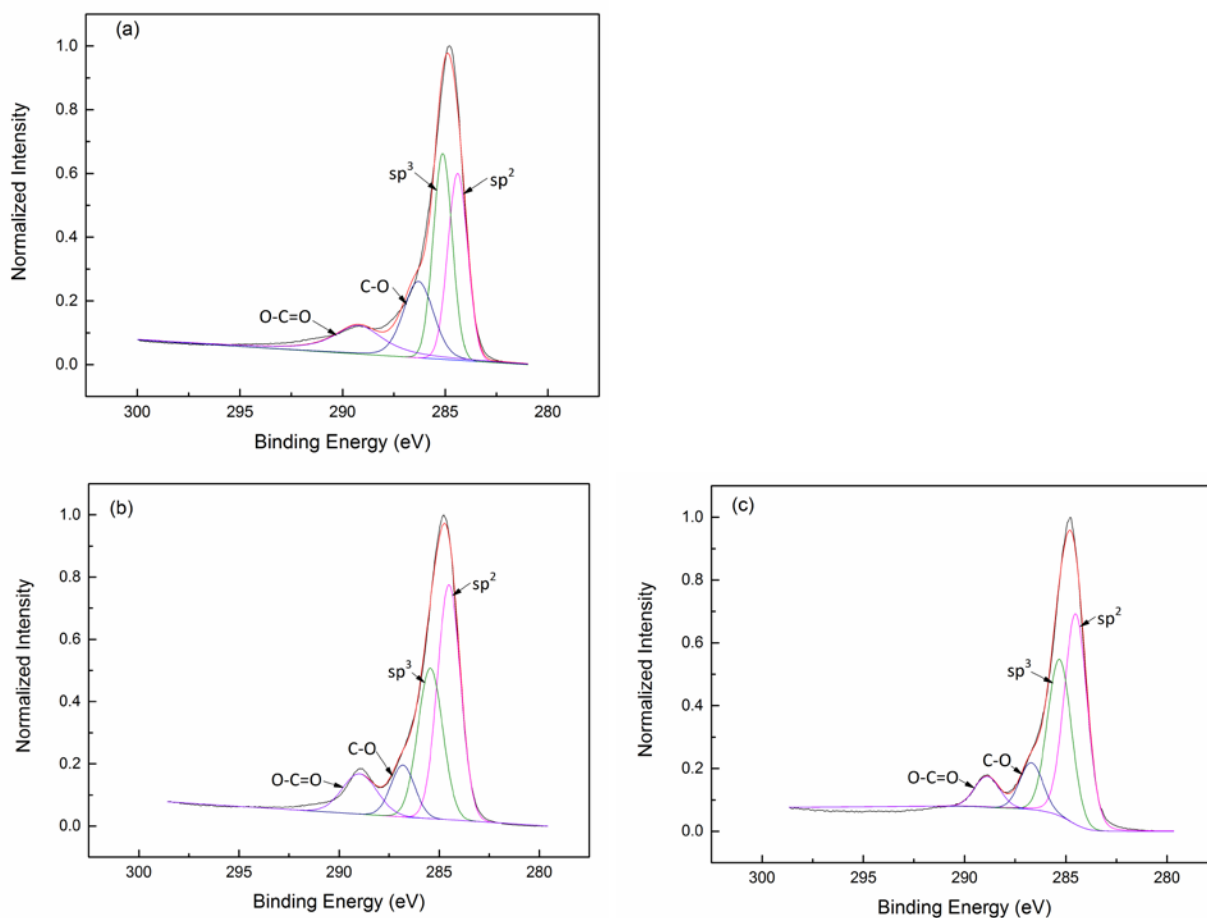

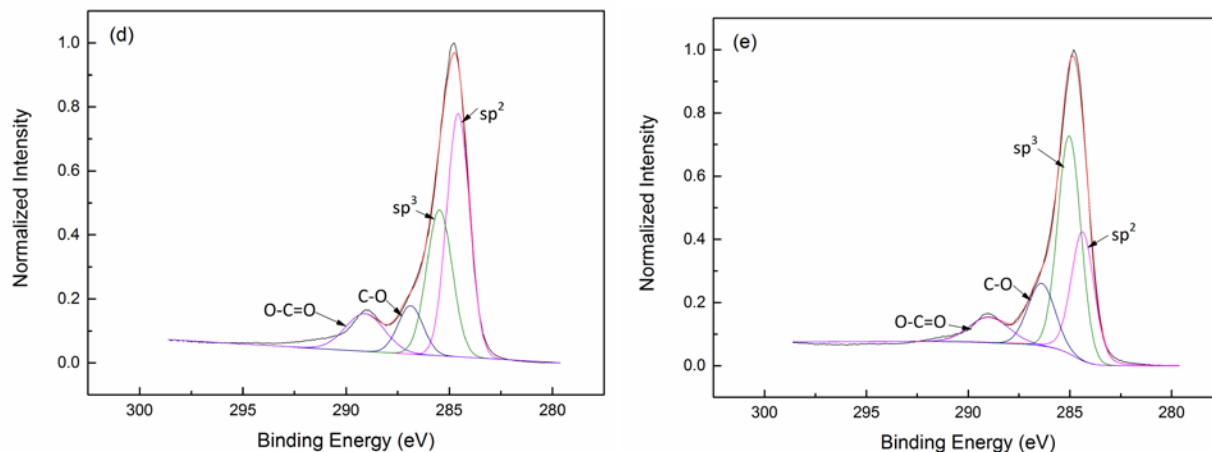

**Figure. S7** XPS spectra of (a) CB; (b) soot A and (c) soot B at ending temperature of 650°C; (d) soot A and (e) soot B at ending temperature of 1000°C.

**Table. S1** Fitting results summary of C1s XPS spectra

| BE(eV) | Functional group              | Area  |                 |                  |                 |                  |
|--------|-------------------------------|-------|-----------------|------------------|-----------------|------------------|
|        |                               | CB    | soot A at 650°C | soot A at 1000°C | soot B at 650°C | soot B at 1000°C |
| 284.6  | sp <sup>2</sup> hybridization | 0.709 | 1.088           | 1.056            | 0.987           | 0.607            |
| 285.4  | sp <sup>3</sup> hybridization | 0.747 | 0.748           | 0.707            | 0.734           | 0.981            |
| 286.4  | C-O                           | 0.474 | 0.247           | 0.228            | 0.212           | 0.33             |
| 288.6  | O-C=O                         | 0.375 | 0.281           | 0.278            | 0.153           | 0.199            |

### Curve fitted of Raman spectra

The Raman spectra was curve fitted with 3 Lorentzian bands and 1 Gaussian band, data analysis was performed using ORIGIN 9.0 software. Table. S2 gives fitting results summary of Raman spectra of partially oxidized soot A and soot B.

**Table. S2** Fitting results summary of Raman spectra

| Raman shift<br>(cm <sup>-1</sup> ) | Characteristic<br>band | Area        |             |             |             |
|------------------------------------|------------------------|-------------|-------------|-------------|-------------|
|                                    |                        | soot A at   | soot B at   | soot A at   | soot B at   |
|                                    |                        | 650°C       | 650°C       | 1000°C      | 1000°C      |
| 1360                               | D <sub>1</sub>         | 77903.45253 | 73509.89044 | 45111.6846  | 41603.95622 |
| 1500                               | D <sub>3</sub>         | 13327.98297 | 31550.38325 | 7792.27899  | 18642.09908 |
| 1580                               | G                      | 20223.45134 | 17478.54997 | 13512.97308 | 8788.98644  |
